# Supplementary material
Source: Springer Nature journal article supplement (https://www.springermedizin.de/resource/supplementary/13012_2012_467_MOESM1_ESM.pdf/9630054)
Supplement: MOESM1 [file 9630054]

## Framework of guideline implementability

| Domain                | Definition                                                  | Example                                          |
|-----------------------|-------------------------------------------------------------|--------------------------------------------------|
| Adaptability          | Variety of versions for different users or purposes         | Full text/summary; print/electronic              |
| Usability             | Content is organised to enhance ease of use                 | Navigation, algorithms; summaries                |
| Validity              | Evidence is summarized to reveal quantity and quality       | Tables, evidence grading system                  |
| Applicability         | Information to apply guidelines for individual patients     | Indications, criteria, risk factors, tips        |
| Communicability       | Information/resources for clinicians or patients/caregivers | To inform, educate, support, involve patients    |
| Resource implications | Changes/resources required to accommodate guidelines        | Technology, staffing, workflow, costs            |
| Implementation        | Strategies for locally implementing guidelines              | Possible barriers, tailoring options             |
| Evaluation            | Instructions for evaluating guideline implementation/use    | Program evaluation or self-audit criteria, tools |

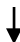

### Type of user

- Clinician
- Manager
- Policy maker

### Decision making

#### Type

- Evidence informed – based on effectiveness data
- Experiential – drawing on professional expertise
- Shared – in negotiation with patients/caregivers
- Policy – allocation of limited resources

#### Process

- Intuitive – trigger and reconcile with previous experience
- Analytic – create or simulate new mental model

### Outcomes

#### Decision-making

- Motivation
- Self-efficacy
- Outcome expectancy
- Intent to use guideline

#### Behavioural

- Guideline use

#### Clinical

- Patient outcomes
